# Supplementary material for: Accuracy of serum procalcitonin for the diagnosis of sepsis in neonates and children with systemic inflammatory syndrome: a meta-analysis
Source: Springer Nature journal article supplement (doi:10.1186/s12879-017-2396-7), 2017-04-24

**PCT neon - cut-off < 2**

| Study             | TP | FP | FN | TN | Cut-off | Timing | Onset      | Sensitivity (95% CI) | Specificity (95% CI) |
|-------------------|----|----|----|----|---------|--------|------------|----------------------|----------------------|
| Zahedpasha 2009   | 11 | 20 | 0  | 7  | 0.5     | T0     | Early+Late | 1.00 [0.72, 1.00]    | 0.26 [0.11, 0.46]    |
| Naher 2011        | 9  | 18 | 1  | 22 | 0.5     | T0     | Early+Late | 0.90 [0.55, 1.00]    | 0.55 [0.38, 0.71]    |
| Boo 2008          | 16 | 41 | 2  | 28 | 0.5     | T0     | Early+Late | 0.89 [0.65, 0.99]    | 0.41 [0.29, 0.53]    |
| Adib 2012         | 14 | 29 | 6  | 20 | 1.15    | T0     | Early+Late | 0.70 [0.46, 0.88]    | 0.41 [0.27, 0.56]    |
| Lopez Sastre 2006 | 50 | 8  | 11 | 31 | 0.59    | T0     | Late       | 0.82 [0.70, 0.91]    | 0.79 [0.64, 0.91]    |
| Vazzalwar 2004    | 14 | 12 | 4  | 21 | 1.0     | T0     | Late       | 0.78 [0.52, 0.94]    | 0.64 [0.45, 0.80]    |

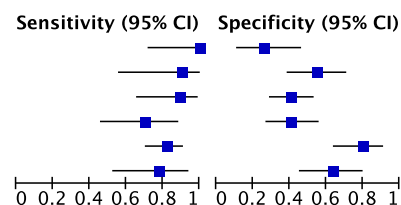

**PCT neon - cut-off = 2/2.5**

| Study              | TP | FP | FN | TN | Cut-off | Timing | Onset      | Sensitivity (95% CI) | Specificity (95% CI) |
|--------------------|----|----|----|----|---------|--------|------------|----------------------|----------------------|
| Resch 2003         | 34 | 10 | 7  | 17 | 2.0     | T0     | Early      | 0.83 [0.68, 0.93]    | 0.63 [0.42, 0.81]    |
| Guibourdenche 2002 | 18 | 9  | 3  | 79 | 2.5     | T0     | Early      | 0.86 [0.64, 0.97]    | 0.90 [0.81, 0.95]    |
| Koskenvuo 2003     | 5  | 14 | 0  | 3  | 2.0     | T12    | Early      | 1.00 [0.48, 1.00]    | 0.18 [0.04, 0.43]    |
| Schlapbach 2013    | 29 | 51 | 4  | 53 | 2.0     | T24-72 | Early      | 0.88 [0.72, 0.97]    | 0.51 [0.41, 0.61]    |
| Boo 2008           | 16 | 24 | 2  | 45 | 2.0     | T0     | Early+Late | 0.89 [0.65, 0.99]    | 0.65 [0.53, 0.76]    |
| Zahedpasha 2009    | 11 | 18 | 0  | 9  | 2.0     | T0     | Early+Late | 1.00 [0.72, 1.00]    | 0.33 [0.17, 0.54]    |
| Groselj-Grenc 2009 | 14 | 15 | 3  | 14 | 2.28    | T0     | Early+Late | 0.82 [0.57, 0.96]    | 0.48 [0.29, 0.67]    |
| Sakha 2008         | 18 | 45 | 9  | 45 | 2.5     | T0     | Early+Late | 0.67 [0.46, 0.83]    | 0.50 [0.39, 0.61]    |

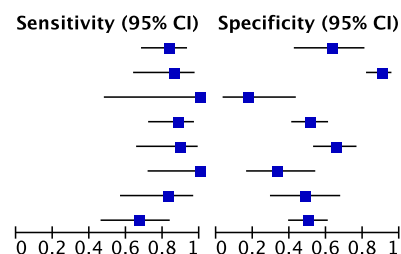

**PCT neon - cut-off > 2.5**

| Study              | TP | FP | FN | TN | Cut-off | Timing | Onset      | Sensitivity (95% CI) | Specificity (95% CI) |
|--------------------|----|----|----|----|---------|--------|------------|----------------------|----------------------|
| Bender 2008        | 20 | 31 | 9  | 63 | 5.75    | T0     | Early      | 0.69 [0.49, 0.85]    | 0.67 [0.57, 0.76]    |
| Resch 2003         | 32 | 2  | 9  | 24 | 6.0     | T0     | Early      | 0.78 [0.62, 0.89]    | 0.92 [0.75, 0.99]    |
| Bonac 2000         | 5  | 9  | 4  | 40 | 9.98    | T0     | Early      | 0.56 [0.21, 0.86]    | 0.82 [0.68, 0.91]    |
| Zahedpasha 2009    | 10 | 4  | 1  | 23 | 10.0    | T0     | Early+Late | 0.91 [0.59, 1.00]    | 0.85 [0.66, 0.96]    |
| Boo 2008           | 13 | 17 | 5  | 52 | 10.0    | T0     | Early+Late | 0.72 [0.47, 0.90]    | 0.75 [0.64, 0.85]    |
| Groselj-Grenc 2009 | 5  | 0  | 11 | 29 | 5.55    | T24    | Early+Late | 0.31 [0.11, 0.59]    | 1.00 [0.88, 1.00]    |

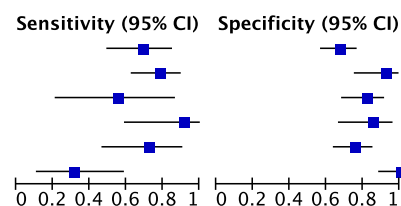

Supplement: MOESM4 [file 12244138]
