# Supplementary material for: Accuracy of serum procalcitonin for the diagnosis of sepsis in neonates and children with systemic inflammatory syndrome: a meta-analysis
Source: Springer Nature journal article supplement (doi:10.1186/s12879-017-2396-7), 2017-04-24
Supplement: MOESM2 [file 12244138]

|                            | RISK OF BIAS      |            |                    |                 | APPLICABILITY CONCERNS |            |                    |
|----------------------------|-------------------|------------|--------------------|-----------------|------------------------|------------|--------------------|
| Study                      | Patient Selection | Index Test | Reference Standard | Flow and Timing | Patient Selection      | Index Test | Reference Standard |
| <b>Neonatal</b>            |                   |            |                    |                 |                        |            |                    |
| <i>Adib 2012</i>           | ☹️                | 😊          | 😊                  | 😊               | 😊                      | 😊          | 😊                  |
| <i>Bender 2008</i>         | 😊                 | 😊          | 😊                  | 😊               | 😊                      | 😊          | 😊                  |
| <i>Bonac 2000</i>          | 😐                 | 😊          | 😐                  | 😊               | 😊                      | 😊          | 😊                  |
| <i>Boo 2008</i>            | 😊                 | 😊          | 😊                  | 😊               | 😊                      | 😊          | 😊                  |
| <i>Groselj- Grenc 2009</i> | 😊                 | 😊          | 😞                  | 😊               | 😊                      | 😊          | 😊                  |
| <i>Guibourdenche 2002</i>  | 😞                 | 😊          | 😐                  | 😊               | 😊                      | 😊          | 😊                  |
| <i>Koskenvuo 2003</i>      | 😐                 | 😊          | 😐                  | 😊               | 😊                      | 😊          | 😊                  |
| <i>Lopez Sastre 2006</i>   | 😊                 | 😊          | 😊                  | 😊               | 😊                      | 😊          | 😊                  |
| <i>Naher 2011</i>          | 😞                 | 😊          | 😊                  | 😊               | 😊                      | 😊          | 😊                  |
| <i>Resch 2003</i>          | 😊                 | 😊          | 😊                  | 😞               | 😊                      | 😊          | 😊                  |
| <i>Sakha 2008</i>          | 😐                 | 😊          | 😊                  | 😊               | 😊                      | 😊          | 😊                  |
| <i>Schlapbach 2013</i>     | 😊                 | 😊          | 😞                  | 😊               | 😊                      | 😊          | 😊                  |
| <i>Vazzalwar 2004</i>      | 😊                 | 😊          | 😊                  | 😊               | 😊                      | 😊          | 😊                  |
| <i>Zahedpasha 2009</i>     | 😐                 | 😊          | 😊                  | 😊               | 😊                      | 😊          | 😊                  |
| <b>Paediatric</b>          |                   |            |                    |                 |                        |            |                    |
| <i>Calò Carducci 2014</i>  | 😊                 | 😊          | 😐                  | 😊               | 😊                      | 😊          | 😊                  |
| <i>Groselj- Grenc 2009</i> | 😊                 | 😊          | 😞                  | 😊               | 😊                      | 😊          | 😊                  |
| <i>Pourakbari 2010</i>     | 😐                 | 😊          | 😊                  | 😊               | 😊                      | 😊          | 😐                  |
| <i>Simon 2008</i>          | 😊                 | 😊          | 😊                  | 😊               | 😊                      | 😊          | 😊                  |
