# Supplementary material for: Accuracy of serum procalcitonin for the diagnosis of sepsis in neonates and children with systemic inflammatory syndrome: a meta-analysis
Source: Springer Nature journal article supplement (doi:10.1186/s12879-017-2396-7), 2017-04-24
Supplement: MOESM3 [file 12244138]

| Study                     | Early or Late Onset | n   | Prevalence of sepsis (%) | Timing of test | PCT Cut-off (ng/mL) | Inclusion Criteria | Diagnosis of sepsis | Sensitivity | Specificity | LR+    | LR-  | DOR    | Ln(DOR) | St error (ln(DOR)) |
|---------------------------|---------------------|-----|--------------------------|----------------|---------------------|--------------------|---------------------|-------------|-------------|--------|------|--------|---------|--------------------|
| <i>Adib 2012</i>          | Early and Late      | 69  | 29                       | 0h             | 1.15                | Suspected sepsis   | MC                  | 0.700       | 0.400       | 1.2    | 0.75 | 1.6    | 0.44    | 0.57               |
| <i>Bender 2008</i>        | Early               | 123 | 24                       | 0h             | 5.75                | Suspected sepsis   | MC or CR            | 0.690       | 0.670       | 2.1    | 0.46 | 4.5    | 1.51    | 0.46               |
|                           |                     |     |                          |                | 25                  |                    |                     | 0.207       | 0.926       | 2.8    | 0.86 | 3.2    | 1.18    | 0.60               |
| <i>Bonac 2000</i>         | Early               | 58  | 15                       | 0h             | 9.98                | Suspected sepsis   | MC or CR            | 0.520       | 0.910       | 5.8    | 0.53 | 11.0   | 2.39    | 0.83               |
|                           |                     |     |                          | 24h            | 13.03               |                    |                     | 0.590       | 0.820       | 3.3    | 0.50 | 6.6    | 1.88    | 0.77               |
|                           |                     |     |                          | 48h            | 3.07                |                    |                     | 0.500       | 1.000       | 2450.5 | 0.50 | 4900.0 | 8.50    | 10.02              |
| <i>Boo 2008</i>           | Early and Late      | 87  | 21                       | 0h             | 0.5                 | Suspected Sepsis   | MC                  | 0.889       | 0.406       | 1.5    | 0.27 | 5.5    | 1.70    | 0.79               |
|                           |                     |     |                          | 12-24 h        | 2                   |                    |                     | 0.889       | 0.652       | 2.6    | 0.17 | 15.0   | 2.71    | 0.79               |
|                           |                     |     |                          | 36-48 h        | 10                  |                    |                     | 0.722       | 0.754       | 2.9    | 0.37 | 8.0    | 2.07    | 0.60               |
| <i>Groselj-Grenc 2009</i> | Early and Late      | 46  | 63                       | 0h             | 2.28                | SIRS               | MC or CR            | 0.824       | 0.483       | 1.6    | 0.37 | 4.4    | 1.47    | 0.74               |
|                           |                     |     |                          | 24h            | 5.55                |                    |                     | 0.313       | 1.000       | 906.6  | 0.69 | 1318.2 | 7.18    | 10.02              |
| <i>Guibourdenche 2002</i> | Early               | 120 | 18                       | 0-72h          | 2.5                 | Suspected sepsis   | MC or CR            | 0.857       | 0.898       | 8.4    | 0.16 | 52.7   | 3.96    | 0.72               |
| <i>Koskenvuo 2003</i>     | Early               | 22  | 22                       | 12 h           | 2                   | SIRS               | MC or CR            | 0.998       | 0.176       | 1.2    | 0.01 | 107.1  | 4.67    | 10.03              |
| <i>Lopez Sastre 2006</i>  | Late                | 100 | 61                       | 0 h            | 0.59                | Suspected sepsis   | MC                  | 0.820       | 0.795       | 4.0    | 0.23 | 17.6   | 2.87    | 0.52               |
|                           |                     |     |                          | 12-24 h        | 1.34                |                    |                     | 0.869       | 0.718       | 3.1    | 0.18 | 16.9   | 2.83    | 0.52               |
|                           |                     |     |                          | 36-48 h        | 0.69                |                    |                     | 0.738       | 0.795       | 3.6    | 0.33 | 10.9   | 2.39    | 0.49               |
| <i>Naher 2011</i>         | Early and Late      | 50  | 80                       | 0h             | 0.5                 | Suspected Sepsis   | MC or CR            | 0.900       | 0.550       | 2.0    | 0.18 | 11.0   | 2.40    | 1.10               |
| <i>Resch 2003</i>         | Early               | 68  | 61                       | 0h             | 2                   | Suspected Sepsis   | MC or CR            | 0.830       | 0.610       | 2.1    | 0.28 | 7.6    | 2.03    | 0.57               |
|                           |                     |     |                          |                | 6                   |                    |                     | 0.770       | 0.910       | 8.6    | 0.25 | 33.9   | 3.52    | 0.77               |
|                           |                     |     |                          |                | 14                  |                    |                     | 0.630       | 1.000       | 1701.6 | 0.37 | 4597.3 | 8.43    | 10.01              |
| <i>Sakha 2008</i>         | Early and Late      | 117 | 23                       | -              | 2.5                 | Suspected sepsis   | MC                  | 0.667       | 0.500       | 1.3    | 0.67 | 2.0    | 0.69    | 0.46               |
| <i>Schlapbach 2013</i>    | Early               | 137 | 24.1                     | 0 h            | 2                   | Suspected sepsis   | MC or CR            | 0.879       | 0.510       | 1.8    | 0.24 | 7.5    | 2.02    | 0.57               |
| <i>Vazzalwar 2004</i>     | Late                | 51  | 35.3                     | 0 h            | 0.5                 | Suspected sepsis   | MC or CR            | 0.944       | 0.364       | 1.5    | 0.15 | 9.7    | 2.27    | 1.09               |
|                           |                     |     |                          |                | 1                   |                    |                     | 0.778       | 0.636       | 2.1    | 0.35 | 6.1    | 1.81    | 0.67               |
| <i>Zahedpasha 2009</i>    | Early and Late      | 38  | 28.9                     | 0 h            | 0.5                 | Suspected sepsis   | MC or CR            | 0.999       | 0.259       | 1.3    | 0.00 | 385.0  | 5.95    | 10.01              |
|                           |                     |     |                          |                | 2                   |                    |                     | 0.999       | 0.333       | 1.5    | 0.00 | 550.0  | 6.31    | 10.01              |
|                           |                     |     |                          |                | 10                  |                    |                     | 0.909       | 0.852       | 6.1    | 0.11 | 57.5   | 4.05    | 1.18               |
