# Supplementary material for: Accuracy of serum procalcitonin for the diagnosis of sepsis in neonates and children with systemic inflammatory syndrome: a meta-analysis
Source: Springer Nature journal article supplement (doi:10.1186/s12879-017-2396-7), 2017-04-24
Supplement: MOESM6 [file 12244138]

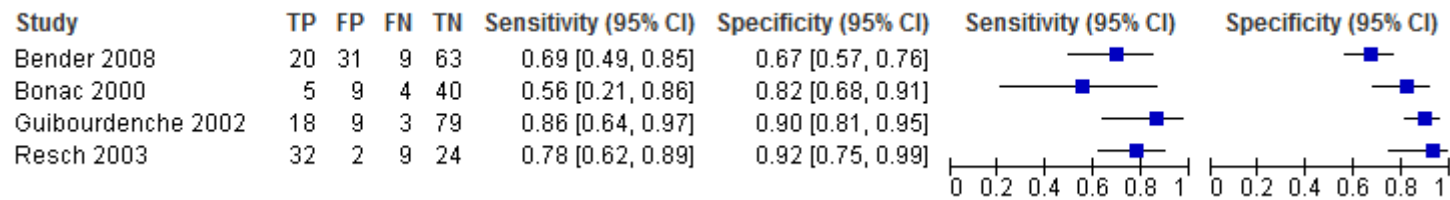

| Cut-off | Study               | Summary statistics            |
|---------|---------------------|-------------------------------|
| >2.5    | Bender (5.75)       |                               |
|         | Bonac (9.98)        | <b>SE = 0.75 (0.64; 0.84)</b> |
|         | Guibourdenche (2.5) | <b>SP = 0.83 (0.71; 0.91)</b> |
|         | Resch (6)           |                               |
