# Supplementary material for: Accuracy of serum procalcitonin for the diagnosis of sepsis in neonates and children with systemic inflammatory syndrome: a meta-analysis
Source: Springer Nature journal article supplement (doi:10.1186/s12879-017-2396-7), 2017-04-24

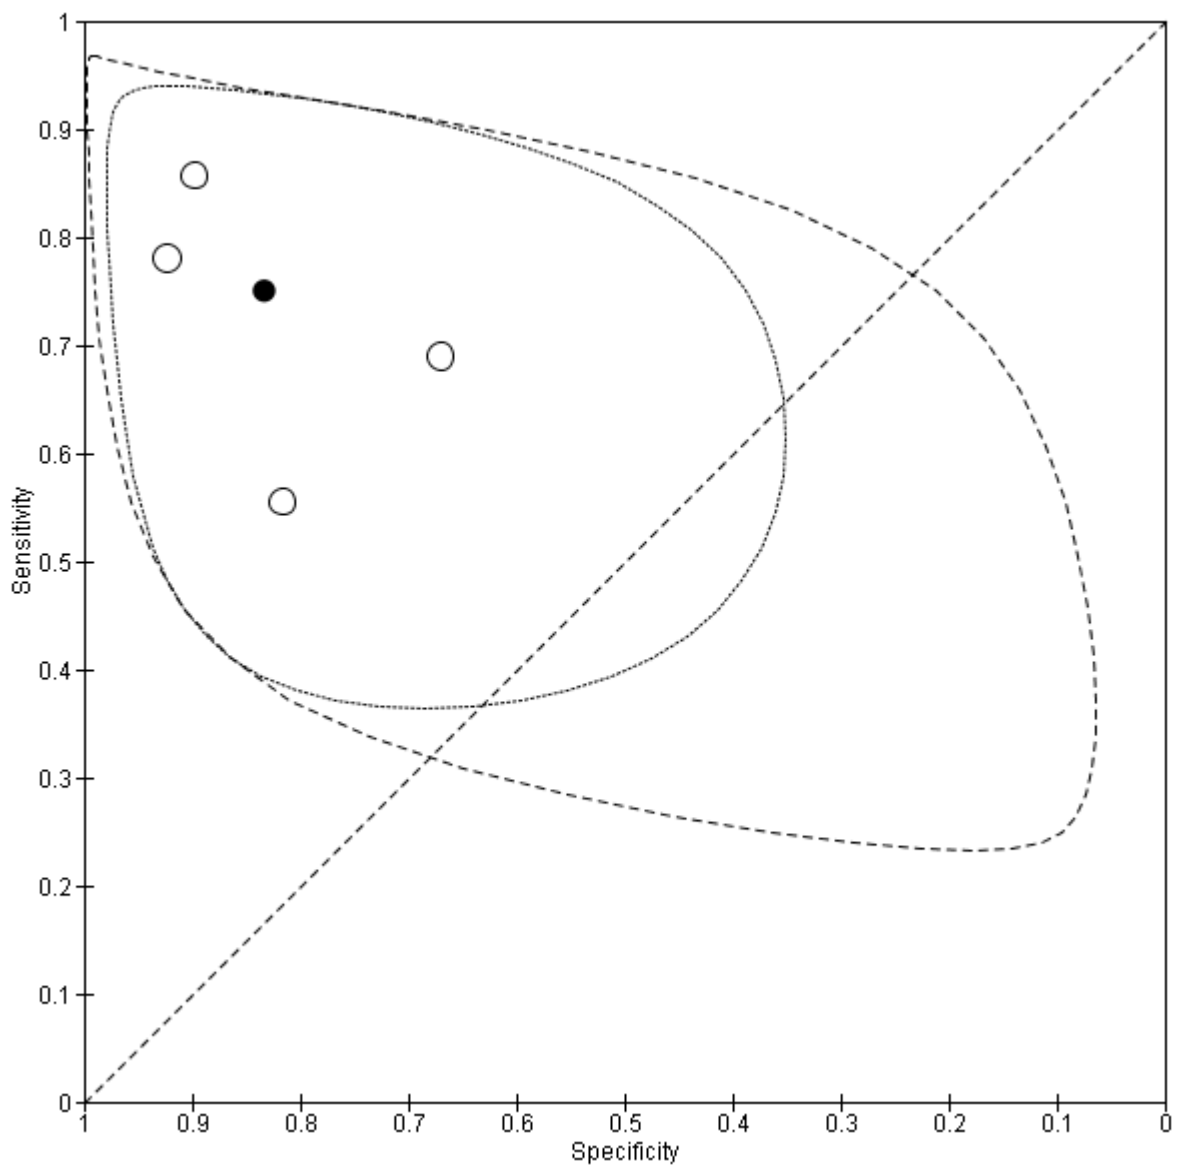

Supplement: MOESM7 [file 12244138]
