# Supplementary material for: Accuracy of serum procalcitonin for the diagnosis of sepsis in neonates and children with systemic inflammatory syndrome: a meta-analysis
Source: Springer Nature journal article supplement (doi:10.1186/s12879-017-2396-7), 2017-04-24
Supplement: MOESM8 [file 12244138]

**Additional file 8. Table of included pediatric studies.**

| Study                     | n   | Prevalence of sepsis | Timing of test | PCT Cut-off (ng/mL) | Inclusion Criteria | Outcome Diagnosis | Sensitivity % | Specificity % | LR + | LR - | DOR  | Ln(DOR) | St error (ln(DOR)) |
|---------------------------|-----|----------------------|----------------|---------------------|--------------------|-------------------|---------------|---------------|------|------|------|---------|--------------------|
| <i>Calò Carducci 2014</i> | 64  | 64                   | 0h             | 0.55                | SIRS               | MC or CR          | 0.878         | 0.739         | 3.4  | 0.16 | 20.4 | 3.02    | 0.67               |
| <i>Groselj-Grenc 2009</i> | 36  | 67                   | 0h             | 0.28                | SIRS               | CR                | 0.833         | 0.750         | 3.3  | 0.22 | 15.0 | 2.71    | 0.86               |
|                           |     |                      | 24h            | 0.65                |                    |                   | 0.810         | 0.880         | 6.8  | 0.22 | 31.3 | 3.44    | 1.04               |
| <i>Pourakbari 2010</i>    | 158 | 79                   | 0h             | 0.5                 | SIRS               | MC                | 0.800         | 0.359         | 1.2  | 0.56 | 2.2  | 0.81    | 0.60               |
|                           |     |                      |                | 2                   |                    |                   | 0.680         | 0.744         | 2.7  | 0.43 | 6.2  | 1.82    | 0.56               |
|                           |     |                      |                | 10                  |                    |                   | 0.520         | 0.821         | 2.9  | 0.59 | 5.0  | 1.60    | 0.58               |
| <i>Simon 2008</i>         | 64  | 39                   | 24h            | 0.5                 | SIRS               | CR                | 0.649         | 0.469         | 1.2  | 0.75 | 1.6  | 0.49    | 0.34               |
|                           |     |                      |                | 2.5                 |                    |                   | 0.439         | 0.796         | 2.1  | 0.71 | 3.0  | 1.11    | 0.37               |
|                           |     |                      |                | 5                   |                    |                   | 0.298         | 0.888         | 2.7  | 0.79 | 3.4  | 1.21    | 0.43               |

CR, Chart review; DOR, diagnostic odds ratio; LR +, positive likelihood ratio; LR -, negative likelihood ratio; MC, Microbiologically confirmation; PCT, procalcitonin; SIRS, systemic inflammatory response syndrome.
