# Supplementary material for: Accuracy of serum procalcitonin for the diagnosis of sepsis in neonates and children with systemic inflammatory syndrome: a meta-analysis
Source: Springer Nature journal article supplement (doi:10.1186/s12879-017-2396-7), 2017-04-24

**PCT ped - cut-off < 2**

| Study               | TP | FP | FN | TN | Cut-off | Sensitivity (95% CI) | Specificity (95% CI) |
|---------------------|----|----|----|----|---------|----------------------|----------------------|
| Calo' Carducci 2014 | 36 | 6  | 5  | 17 | 0.55    | 0.88 [0.74, 0.96]    | 0.74 [0.52, 0.90]    |
| Groselj-Grenc 2009  | 20 | 3  | 4  | 9  | 0.28    | 0.83 [0.63, 0.95]    | 0.75 [0.43, 0.95]    |
| Pourakbari 2010     | 37 | 52 | 20 | 46 | 0.5     | 0.65 [0.51, 0.77]    | 0.47 [0.37, 0.57]    |
| Simon 2008          | 20 | 25 | 5  | 14 | 0.5     | 0.80 [0.59, 0.93]    | 0.36 [0.21, 0.53]    |

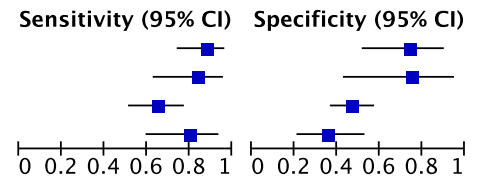

**PCT ped - cut-off = 2/2.5**

| Study           | TP | FP | FN | TN | Cut-off | Sensitivity (95% CI) | Specificity (95% CI) |
|-----------------|----|----|----|----|---------|----------------------|----------------------|
| Pourakbari 2010 | 25 | 20 | 32 | 78 | 2.0     | 0.44 [0.31, 0.58]    | 0.80 [0.70, 0.87]    |
| Simon 2008      | 17 | 10 | 8  | 29 | 2.5     | 0.68 [0.46, 0.85]    | 0.74 [0.58, 0.87]    |

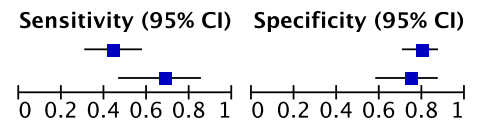

**PCT test ped - cut-off > 2.5**

| Study           | TP | FP | FN | TN | Cut-off | Sensitivity (95% CI) | Specificity (95% CI) |
|-----------------|----|----|----|----|---------|----------------------|----------------------|
| Pourakbari 2010 | 17 | 11 | 40 | 87 | 10.0    | 0.30 [0.18, 0.43]    | 0.89 [0.81, 0.94]    |
| Simon 2008      | 13 | 7  | 12 | 32 | 5.0     | 0.52 [0.31, 0.72]    | 0.82 [0.66, 0.92]    |

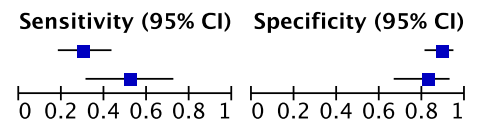

Supplement: MOESM9 [file 12244138]
