# Supplementary material for: Accuracy of serum procalcitonin for the diagnosis of sepsis in neonates and children with systemic inflammatory syndrome: a meta-analysis
Source: Springer Nature journal article supplement (doi:10.1186/s12879-017-2396-7), 2017-04-24
Supplement: MOESM10 [file 12244138]

| Study              | TP | FP | FN | TN | Sensitivity (95% CI) | Specificity (95% CI) | Sensitivity (95% CI)                                                                | Specificity (95% CI)                                                                |
|--------------------|----|----|----|----|----------------------|----------------------|-------------------------------------------------------------------------------------|-------------------------------------------------------------------------------------|
| Calò Carducci 2014 | 36 | 6  | 5  | 17 | 0.88 [0.74, 0.96]    | 0.74 [0.52, 0.90]    |  |  |
| Groselj-Grenc 2009 | 20 | 3  | 4  | 9  | 0.83 [0.63, 0.95]    | 0.75 [0.43, 0.95]    |  |  |
| Lopez Sastre 2006  | 50 | 8  | 11 | 31 | 0.82 [0.70, 0.91]    | 0.79 [0.64, 0.91]    |  |  |
| Pourakbari 2010    | 37 | 52 | 20 | 46 | 0.65 [0.51, 0.77]    | 0.47 [0.37, 0.57]    |  |  |
| Simon 2008         | 20 | 25 | 5  | 14 | 0.80 [0.59, 0.93]    | 0.36 [0.21, 0.53]    |  |  |
| Vazzalwar 2004     | 14 | 12 | 4  | 21 | 0.78 [0.52, 0.94]    | 0.64 [0.45, 0.80]    |  |  |

| PCT Cut-off    | Study                    | Summary statistics            |
|----------------|--------------------------|-------------------------------|
| <b>&lt;2.0</b> | Groselj-Grenc (0.28)     |                               |
|                | Pourabaki (0.5)          |                               |
|                | Simon (0.5)              | <b>SE = 0.79 (0.71; 0.85)</b> |
|                | Calò Carducci (0.55)     | <b>SP = 0.63 (0.48; 0.75)</b> |
|                | Lopez Sastre 2006 (0.59) |                               |
|                | Vazzalwar 2004 (1)       |                               |
